# Supplementary material for: Spin–valley locking in the normal state of a transition-metal dichalcogenide superconductor
Source: Springer Nature journal article supplement (doi:10.1038/ncomms11711), 2016-05-23
Supplement: 41467_2016_BFncomms11711_MOESM1327_ESM.pdf [file 41467_2016_BFncomms11711_MOESM1327_ESM.pdf]

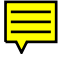

## Supplementary Figures

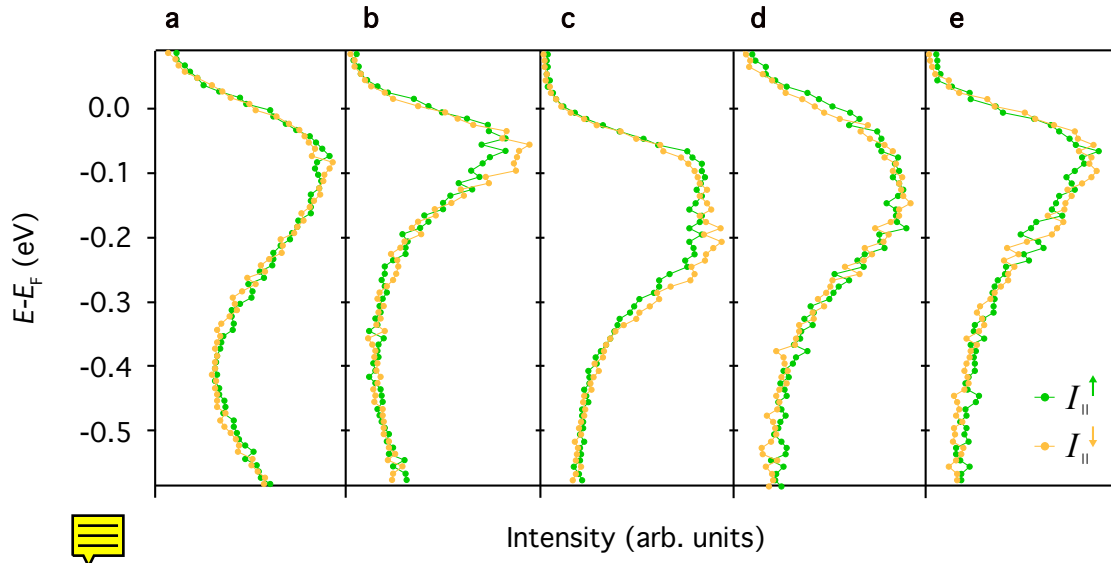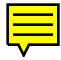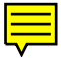

Supplementary Figure 1. **Measured in-plane spin component.** (a-e) Negligible in-plane component of the measured photoelectron spin along the analyser slit (parallel to the  $\bar{\Gamma} - \bar{M}$ ) direction corresponding to the out-of-plane components shown in (b-f) of Fig. 2 of the main text, respectively. The  $x$ -axis tick marks denote the zero of each EDC.

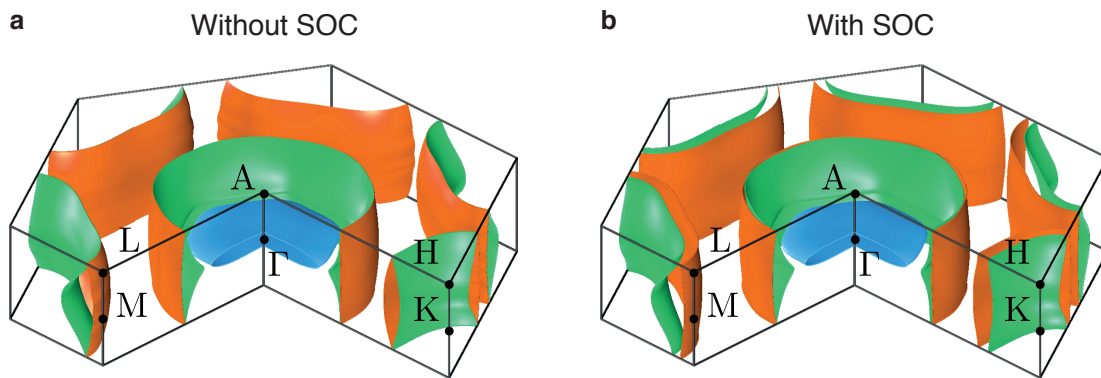

Supplementary Figure 2. **Influence of spin-orbit coupling on the Fermi surface of NbSe<sub>2</sub>.** (a) Three-dimensional Fermi surface of NbSe<sub>2</sub> calculated (a) without and (b) including spin-orbit coupling.

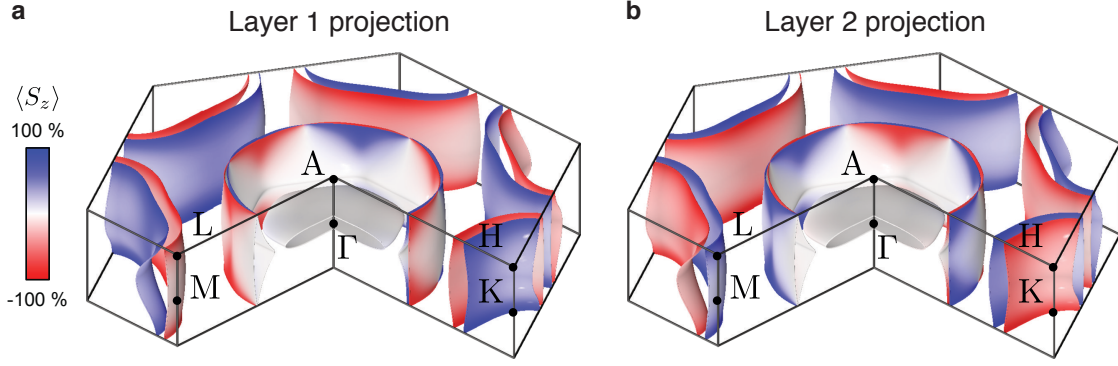

Supplementary Figure 3. **Layer-dependent spin texture.** Calculated out-of-plane component of the Fermi surface spin polarisation projected onto the (a) first and (b) second NbSe<sub>2</sub> layer of the unit cell.

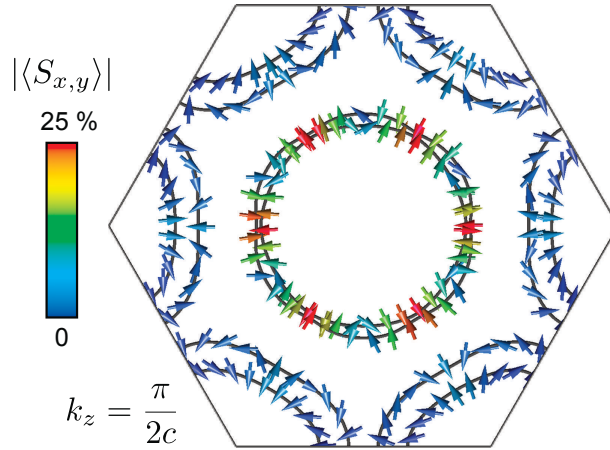

Supplementary Figure 4. **In-plane spin texture.** In-plane vectorial spin texture for the  $k_z = \pi/2c$  plane, with the spin direction shown by arrows and the magnitude shown by the colour scaling. This indicates that the in-plane spin configuration is dominantly radial to the Fermi surface.
